# Supplementary material for: Controlled intramolecular H-transfer in malonaldehyde in the electronic ground state mediated through the conical intersection of 1nπ* and 1ππ* excited electronic states
Source: Royal Society of Chemistry journal article supplement (doi:10.1039/c9cp03762d), 2019-01-01
Supplement: c9cp03762d1.pdf [file c9cp03762d1.pdf]

**Electronic Supplementary Information (ESI)**  
**for**  
**Controlled intramolecular H-transfer in Malonaldehyde in the**  
**electronic ground state mediated through the conical intersection**  
**of  $^1n\pi^*$  and  $^1\pi\pi^*$  excited electronic states**

K. R. Nandipati<sup>a</sup>, Arun Kumar Kanakati<sup>a</sup>, H. Singh<sup>b</sup> and S. Mahapatra<sup>a\*</sup>

<sup>a</sup>*School of Chemistry, University of Hyderabad, Hyderabad 500 046, India and*

<sup>b</sup>*Center for Computational Natural Sciences and Bioinformatics,*

*IIT Hyderabad, Hyderabad, 500 032, India*

---

\* Corresponding author, E-mail: susanta.mahapatra@uohyd.ac.in

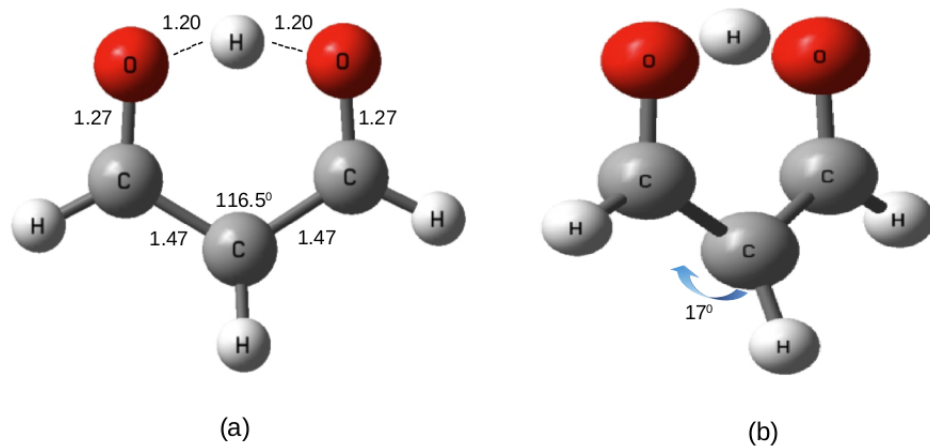

FIG. S1. The optimized geometry of hydrogen-transfer  $S_2/S_1$  conical intersection (in two different orientations shown in a and b), computed with SA-CAS(4,4) SCF/6-31G(d) method.

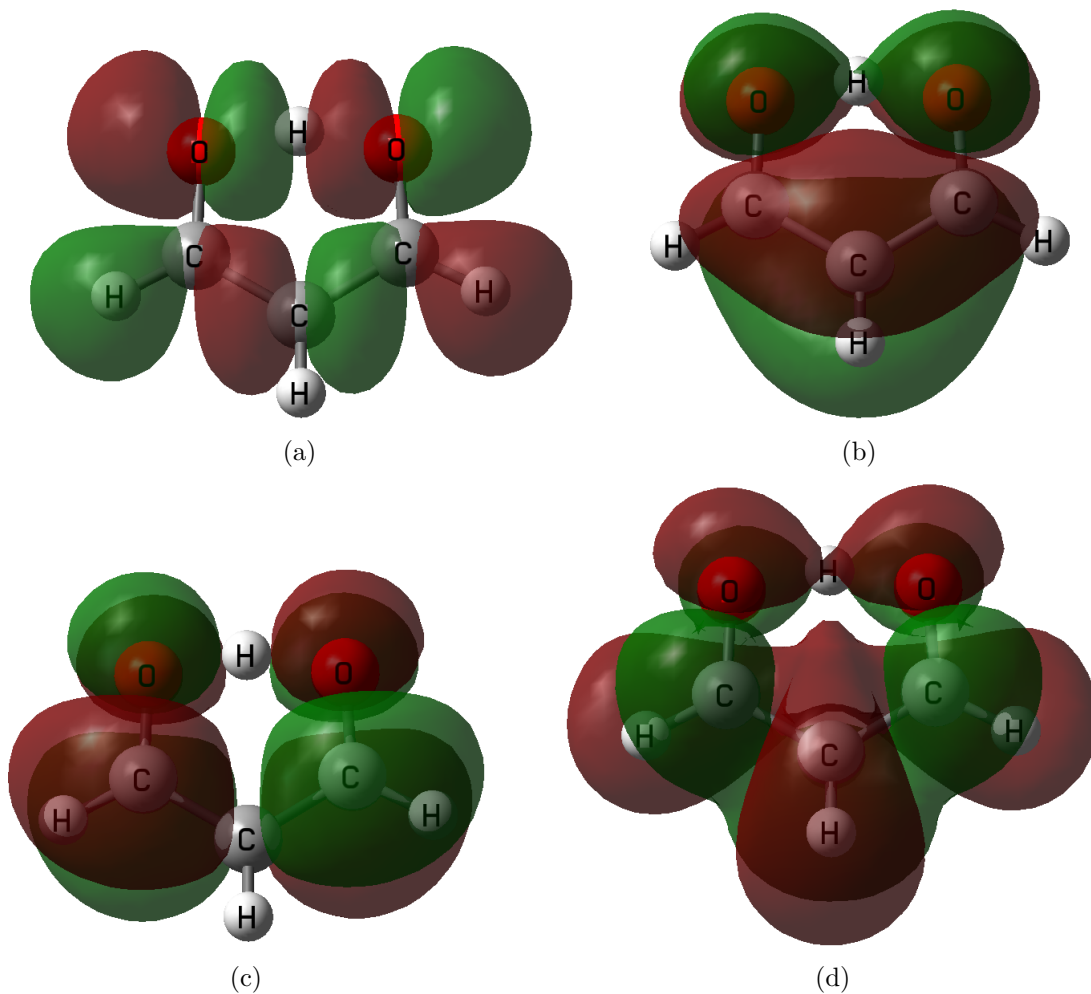

FIG. S2. The active space orbitals chosen at the CI geometry from CAS(4,4) SCF calculations. Plots in panels a, b, c and d, respectively, denote  $n$ ,  $\pi$ ,  $\pi_1^*$ ,  $\pi_2^*$  orbitals.

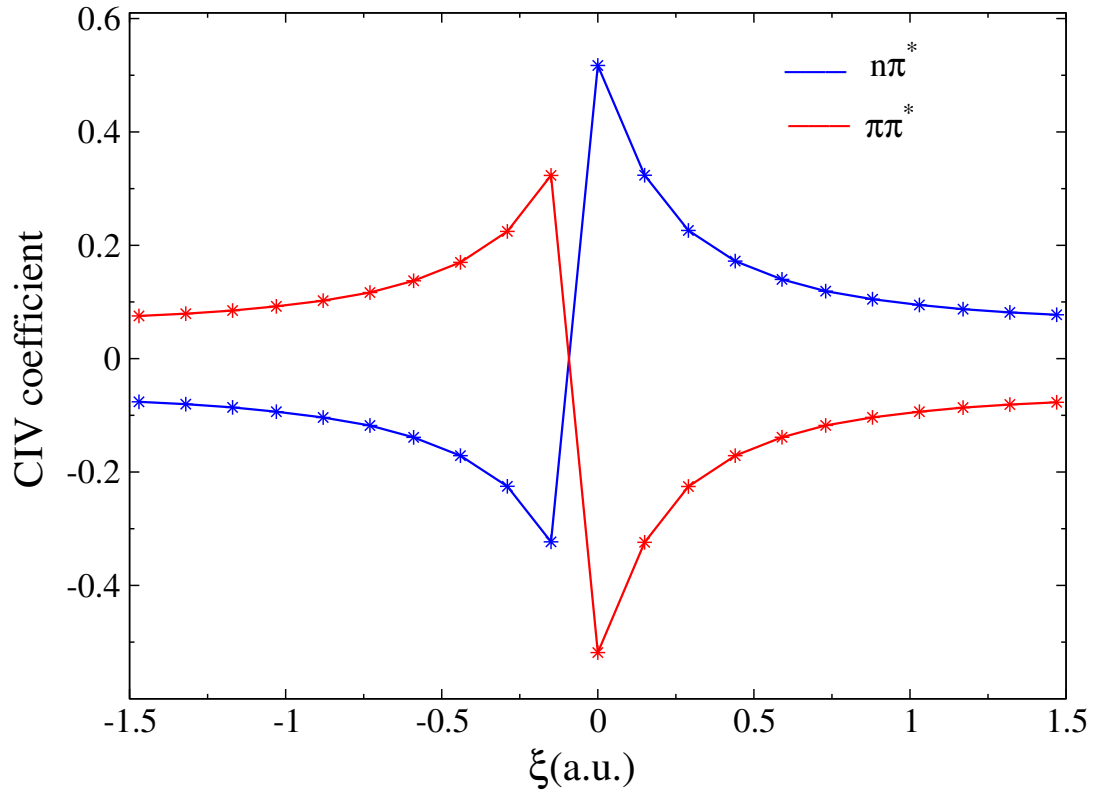

FIG. S3. The configuration interaction vector (CIV) coefficients of  $S_1$  and  $S_2$  electronic states along  $\xi$ . The blue and red colour asterisks are for the  $n\pi^*$  ( $S_1$ ) and  $\pi\pi^*$  ( $S_2$ ) states, respectively.

TABLE S1. Coefficients of configuration interaction wavefunctions at the conical intersection geometry calculated at the CAS(4,4) SCF level of theory. The first column represents the active space orbitals of  $n\pi\pi_1^*\pi_2^*$ . These orbitals are shown in Fig. S2. The second, third and fourth columns represent the coefficients of configuration interaction wavefunctions associated with the  $S_0$ ,  $S_1$  and  $S_2$  states Corresponding to the transition between the active space orbitals. The numbers in bold font reveal strong mixing between the  $S_1$ - $S_2$  states

| $n\pi\pi_1^*\pi_2^*$ | $S_0$      | $S_1$             | $S_2$             |
|----------------------|------------|-------------------|-------------------|
| 2200                 | 0.9842357  | -0.0032572        | -0.0006302        |
| 2ba0                 | -0.0022846 | <b>-0.5178297</b> | <b>-0.4236309</b> |
| 2ab0                 | 0.0022846  | <b>0.5178297</b>  | <b>0.4236309</b>  |
| b2a0                 | 0.0006726  | <b>-0.4225931</b> | <b>0.5165817</b>  |
| a2b0                 | -0.0006726 | <b>0.4225931</b>  | <b>-0.5165817</b> |
| 20ab                 | -0.0001213 | 0.1767158         | 0.1445192         |
| 20ba                 | 0.0001213  | -0.1767158        | -0.1445192        |
| aabb                 | 0.0032851  | 0.0997484         | -0.1219347        |
| bbaa                 | 0.0032851  | 0.0997484         | -0.1219347        |
| 2002                 | -0.1157341 | -0.0016340        | 0.0040155         |
| abab                 | -0.0036956 | -0.0871044        | 0.1064116         |
| baba                 | -0.0036956 | -0.0871044        | 0.1064116         |
| 2020                 | -0.1026442 | 0.0072943         | -0.0091700        |
| b0a2                 | 0.0003179  | 0.0640672         | -0.0782505        |
| a0b2                 | -0.0003179 | -0.0640672        | 0.0782505         |
| 2b0a                 | 0.0600289  | 0.0052125         | -0.0062727        |
| 2a0b                 | -0.0600289 | -0.0052125        | 0.0062727         |
